# Supplementary material for: Aneuvis: web-based exploration of numerical chromosomal variation in single cells
Source: PubMed Central journal article supplement (PMC6580570; doi:10.1186/s12859-019-2842-1), 2019-06-17

# Aneuviz Visualizations Report

*aneuviz 0.7*

*November 26, 2018*

This report was automatically generated from [Aneuviz](#), a web tool for analyzing chromosomal number variation in single cells. Aneuviz summarizes chromosomal copy number data from 3 potential sources: FISH, SKY, and WGS.

## Scores by Group

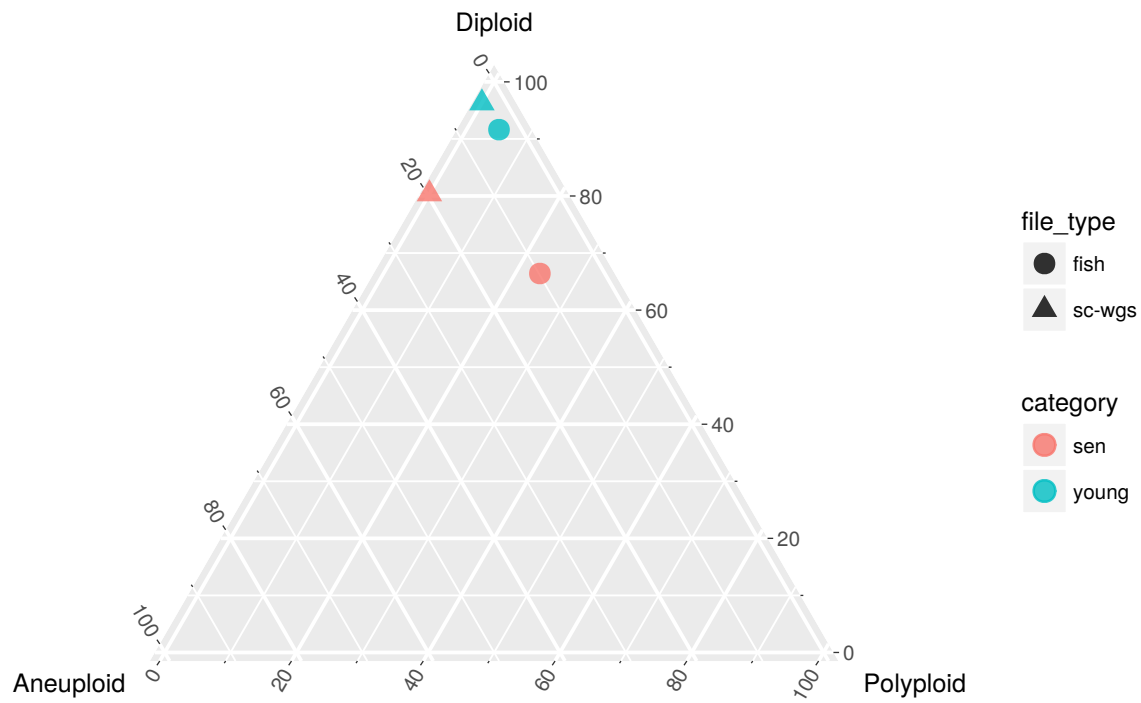

# Aneuploidy vs. Heterogeneity Scatterplots

Scores by Group

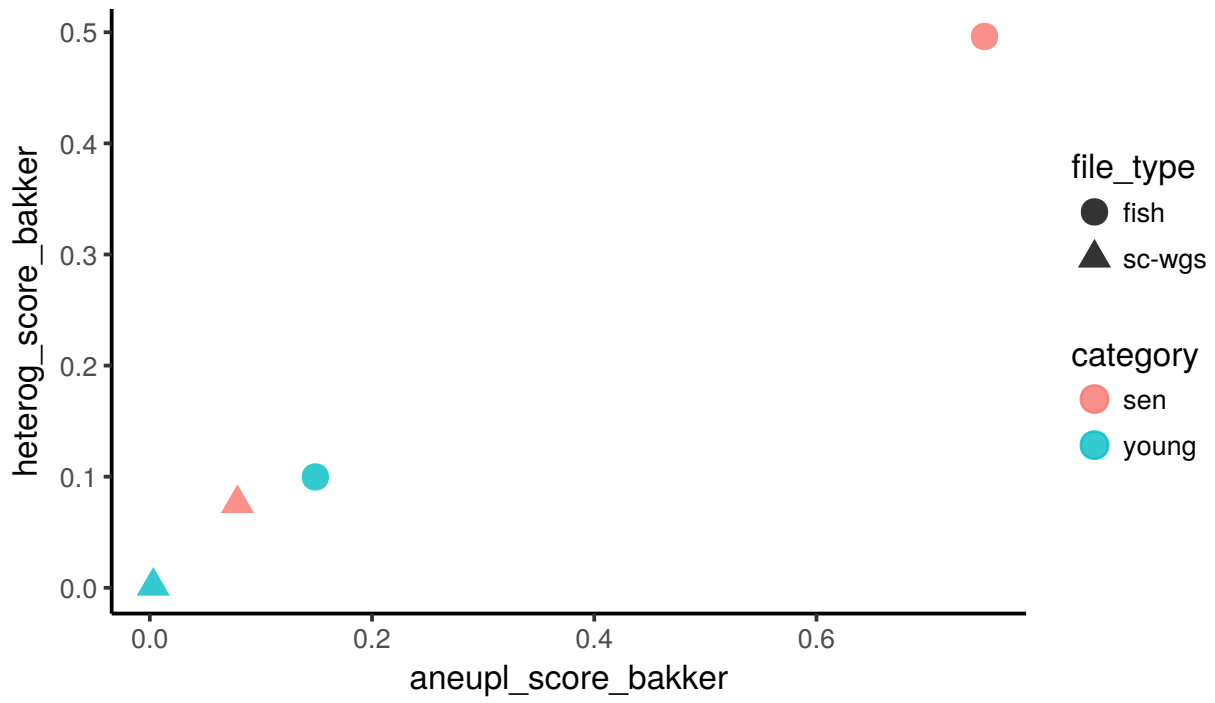

# Scores by Group and Chromosome

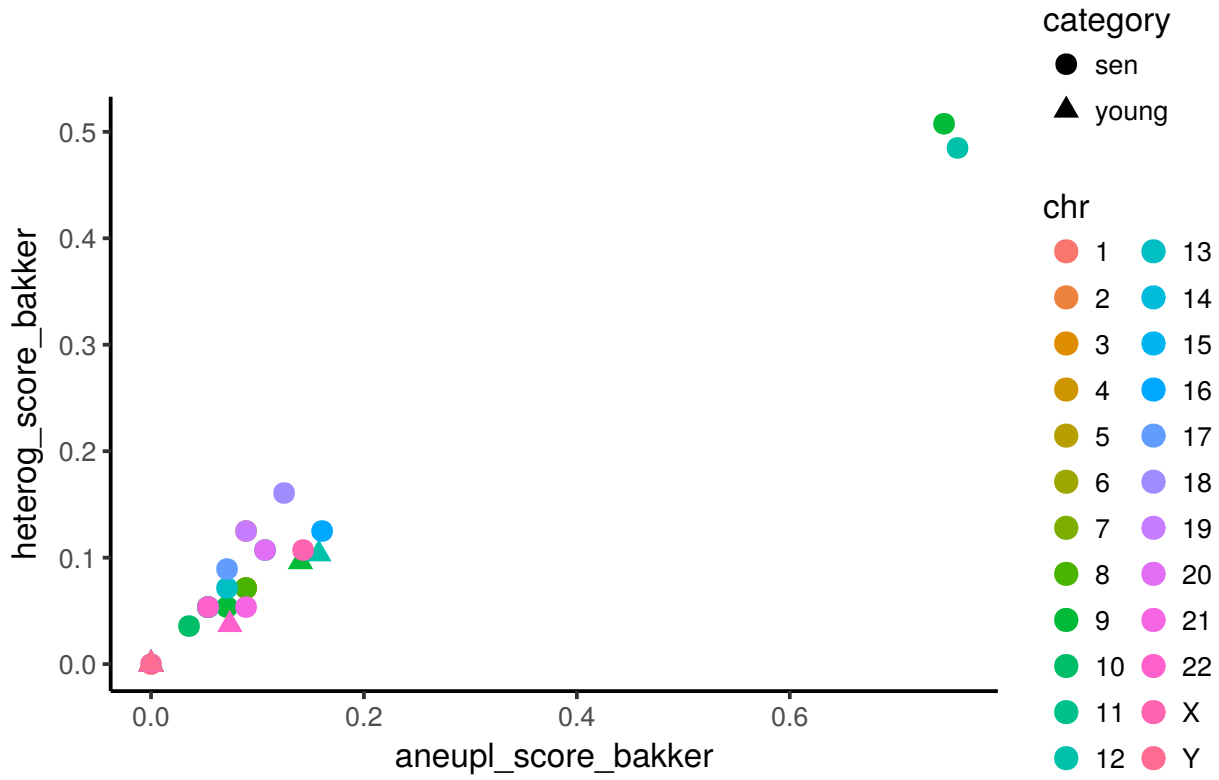



# FISH gridplots

% aneuploidy across 396 observations  
file: sen

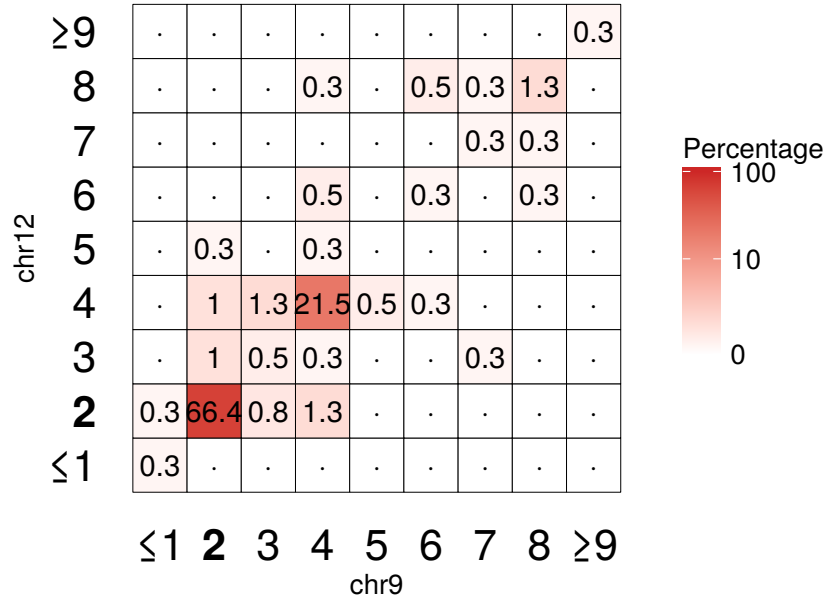

% aneuploidy across 406 observations  
file: young

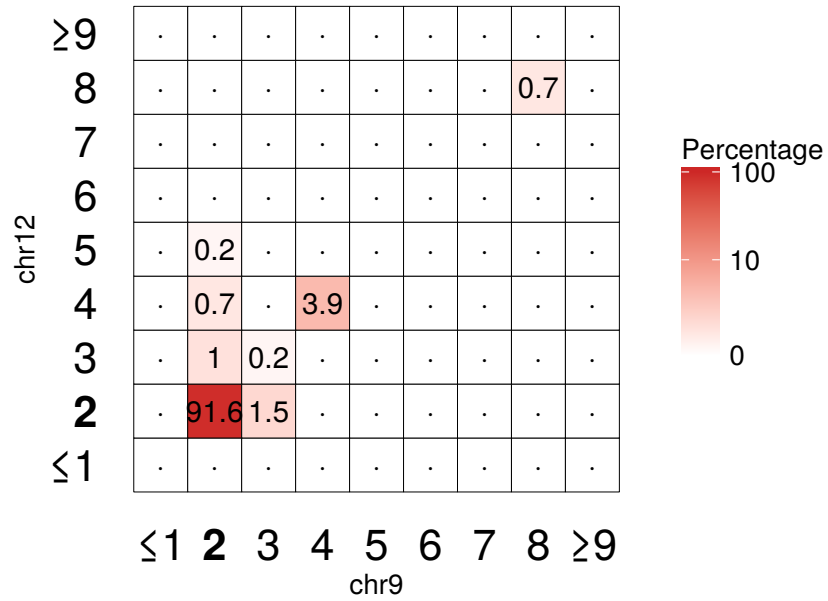

Supplement: 12859_2019_2842_MOESM1_ESM.pdf [file 12859_2019_2842_MOESM1_ESM.pdf]
